# Supplementary material
Source: PubMed Central journal article supplement (PMC4751585)
Supplement: NIHMS731848-supplement-3.pdf [file NIHMS731848-supplement-3.pdf]

## IP: HA

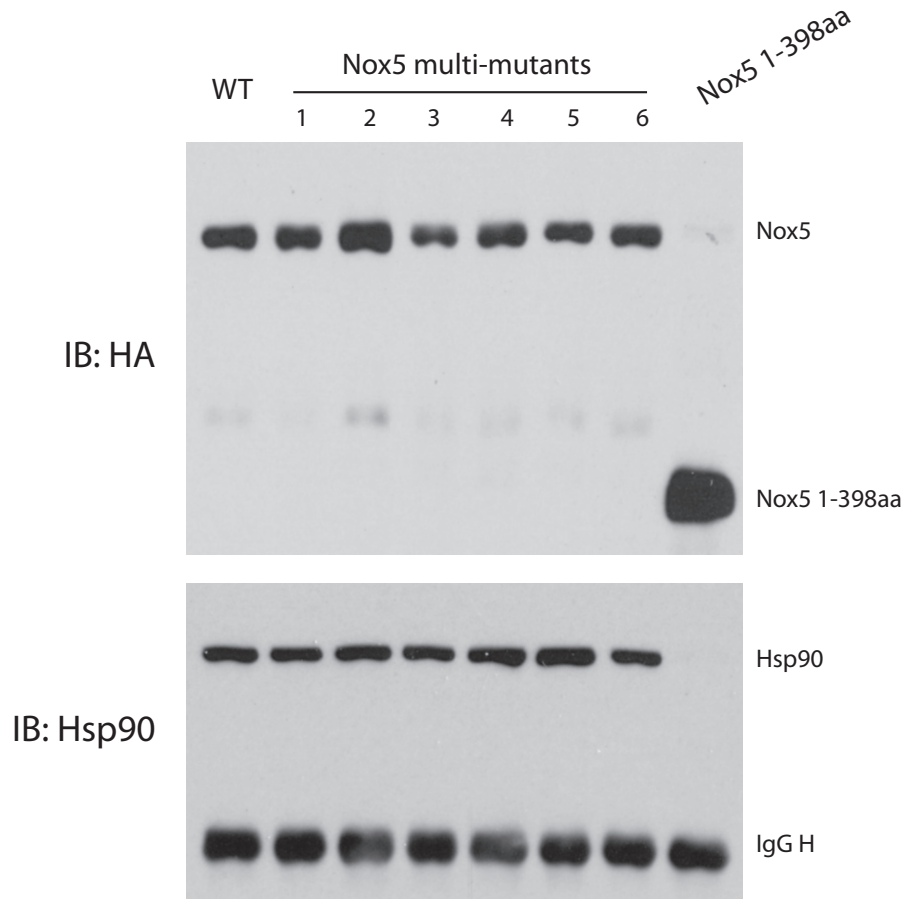

### Nox5 mutations

1. Nox5-F533L, G621D,
2. Nox5-V400T, F533L, I576K, G621D,
3. Nox5-I462L-R463K, F533L, G621D,
4. Nox5-V400T, W443N, F533L, I576K, G621D,
5. Nox5-V400T, W443N, F533L, I576K, G621H,
6. Nox5-V400T, F533L, G621D,

Supplemental Figure 3
