# Supplementary material
Source: PubMed Central journal article supplement (PMC4751585)

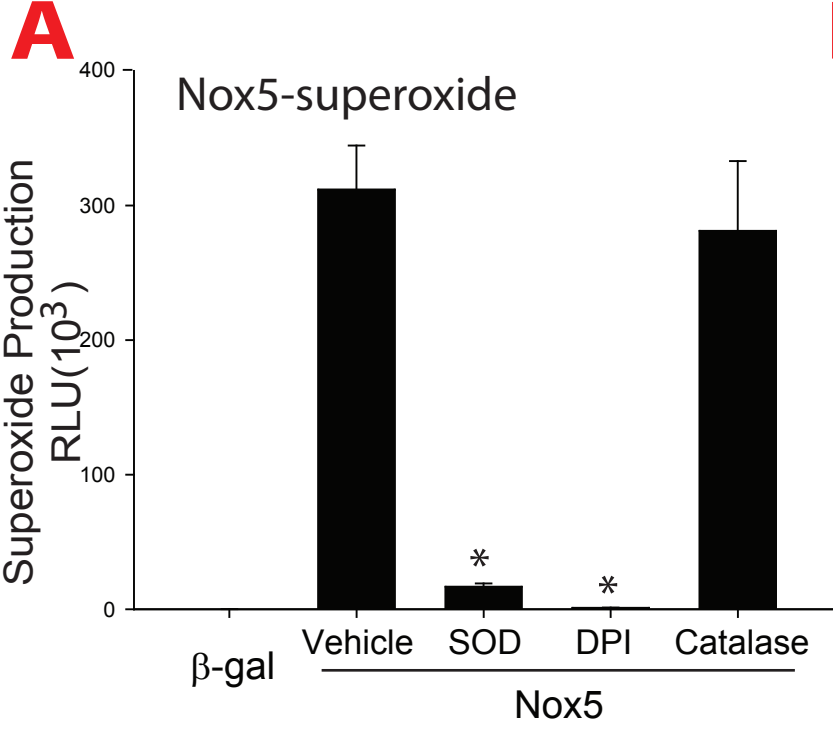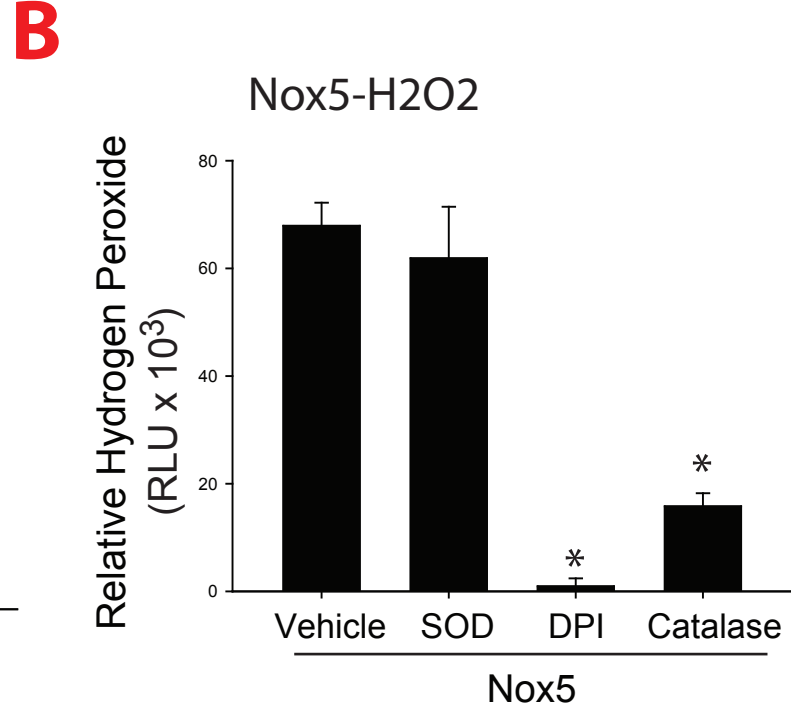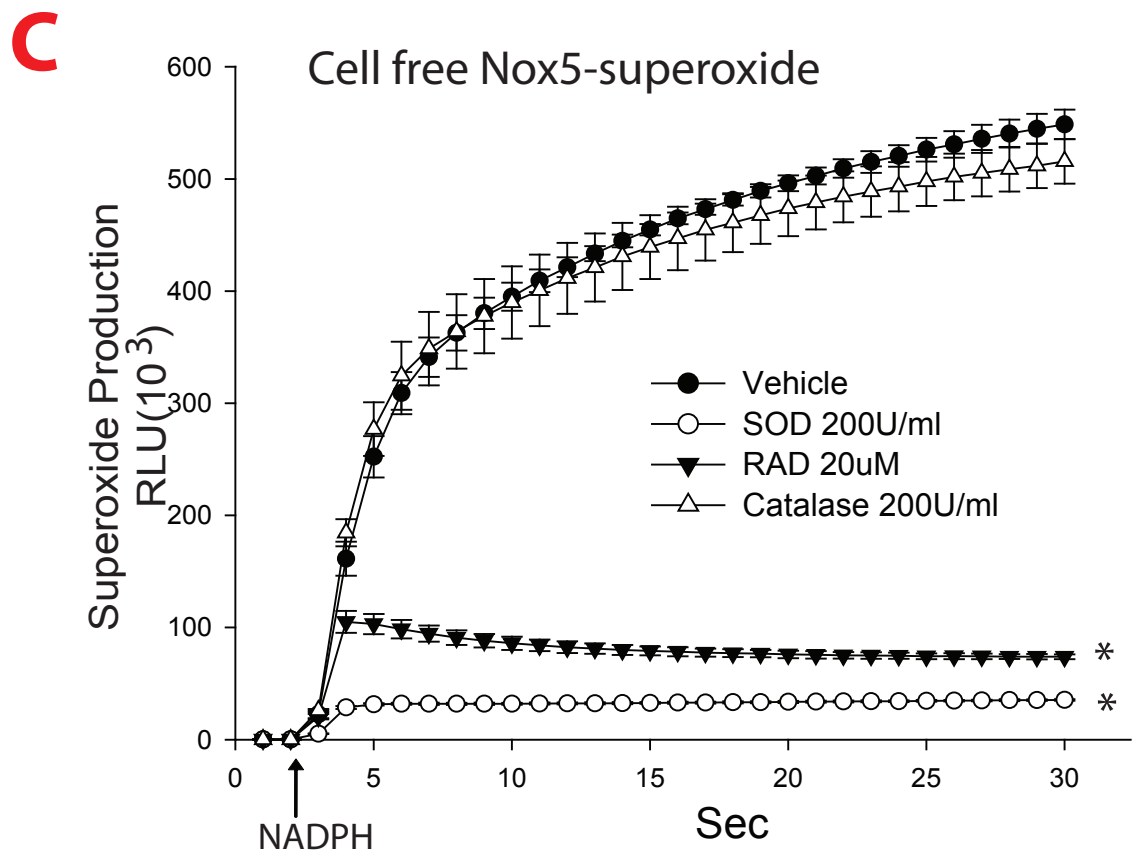

Supplemental Figure 1

Supplement: NIHMS731848-supplement-1.pdf [file NIHMS731848-supplement-1.pdf]

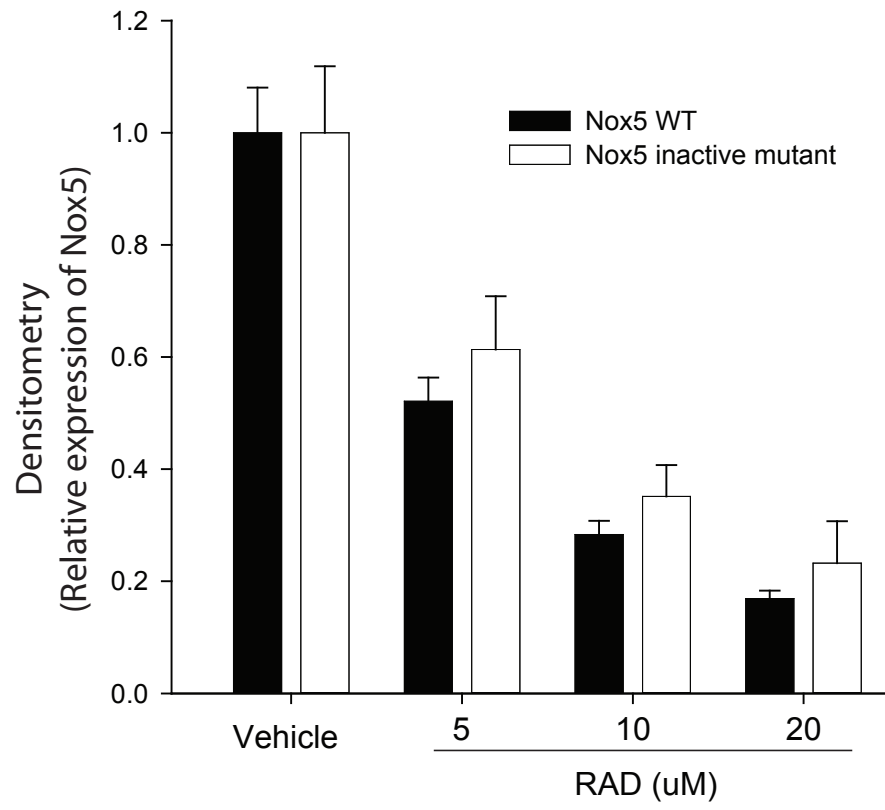

Supplemental Figure 2

Supplement: NIHMS731848-supplement-2.pdf [file NIHMS731848-supplement-2.pdf]

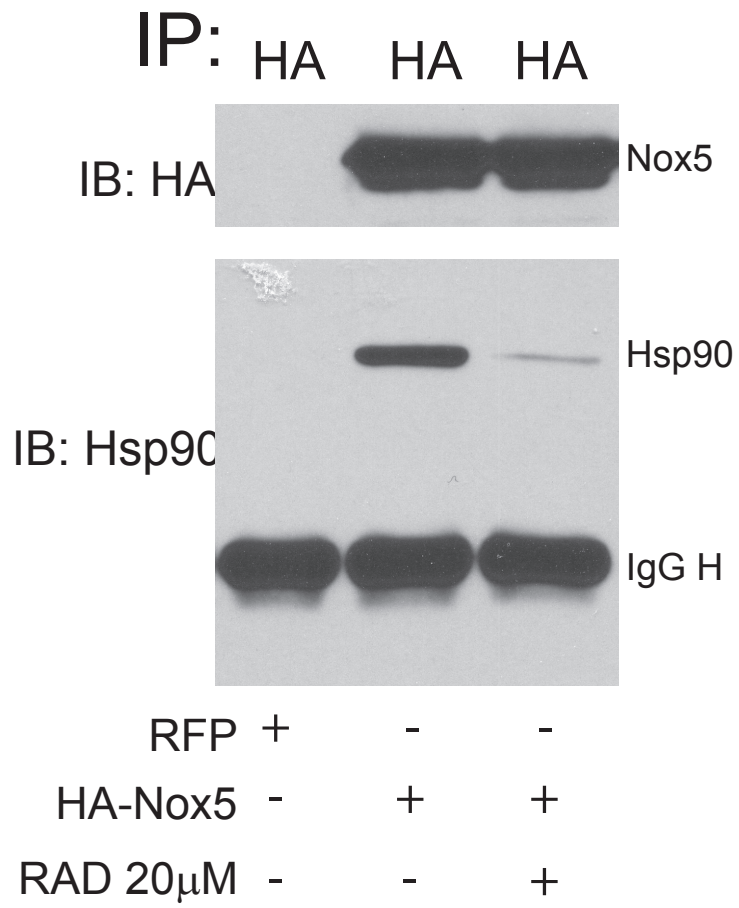

Supplemental Figure 4

Supplement: NIHMS731848-supplement-4.pdf [file NIHMS731848-supplement-4.pdf]
